# Supplementary material
Source: Springer Nature journal article supplement (https://www.springermedizin.de/resource/supplementary/12880_2006_37_MOESM5_ESM.pdf/9450418)

Se:3  
Im:142

[A]

Study Date:3/6/2007  
Study Time:2:05:00 PM  
MRN:

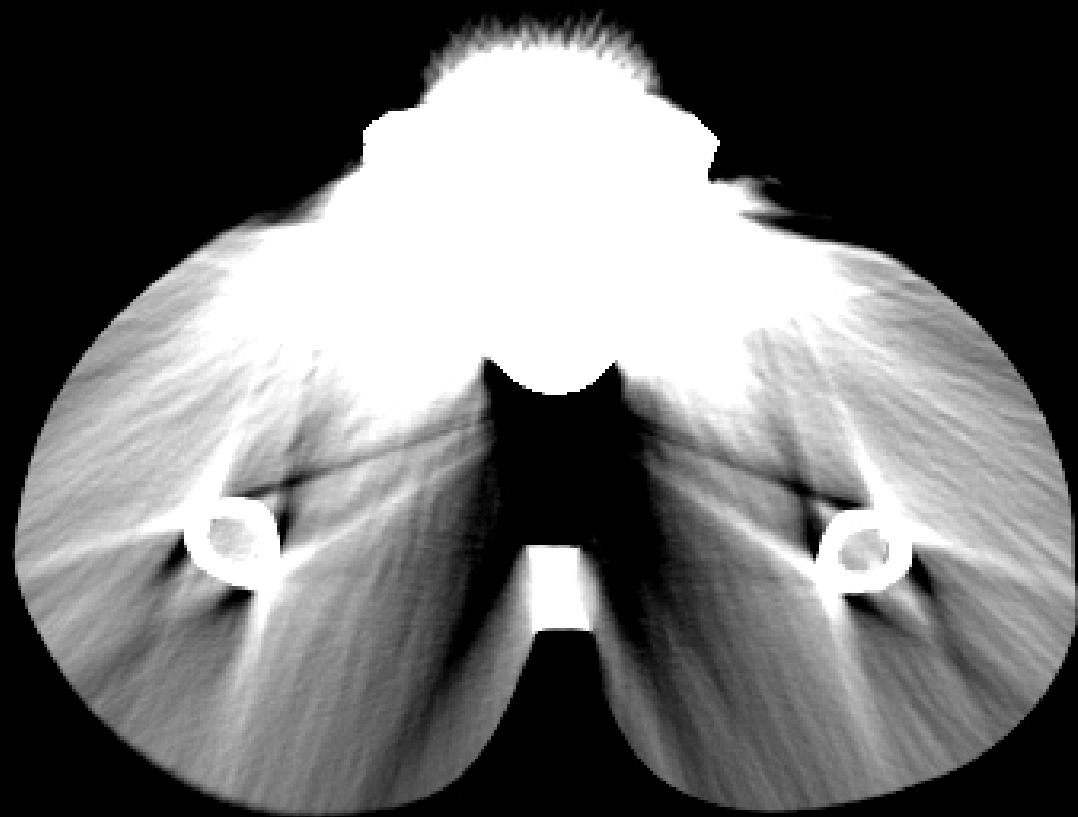

[R]

[L]

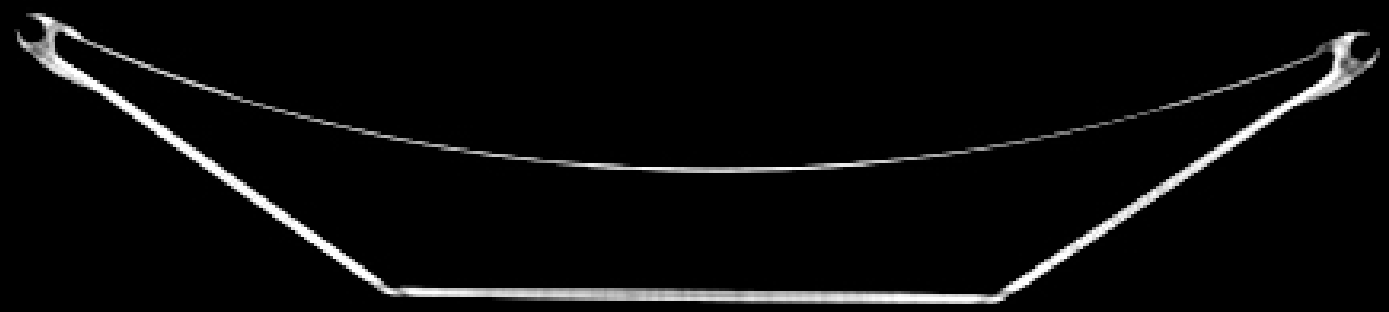

[P]

C-26  
W401

Supplement: MOESM5 [file 9450418]
